# Supplementary material for: A distinct mechanism of epigenetic reprogramming silences PAX2 and initiates endometrial carcinogenesis
Source: JCI journal article supplement (doi:10.1172/jci190989), 2025-08-15

**Fig 1G.**

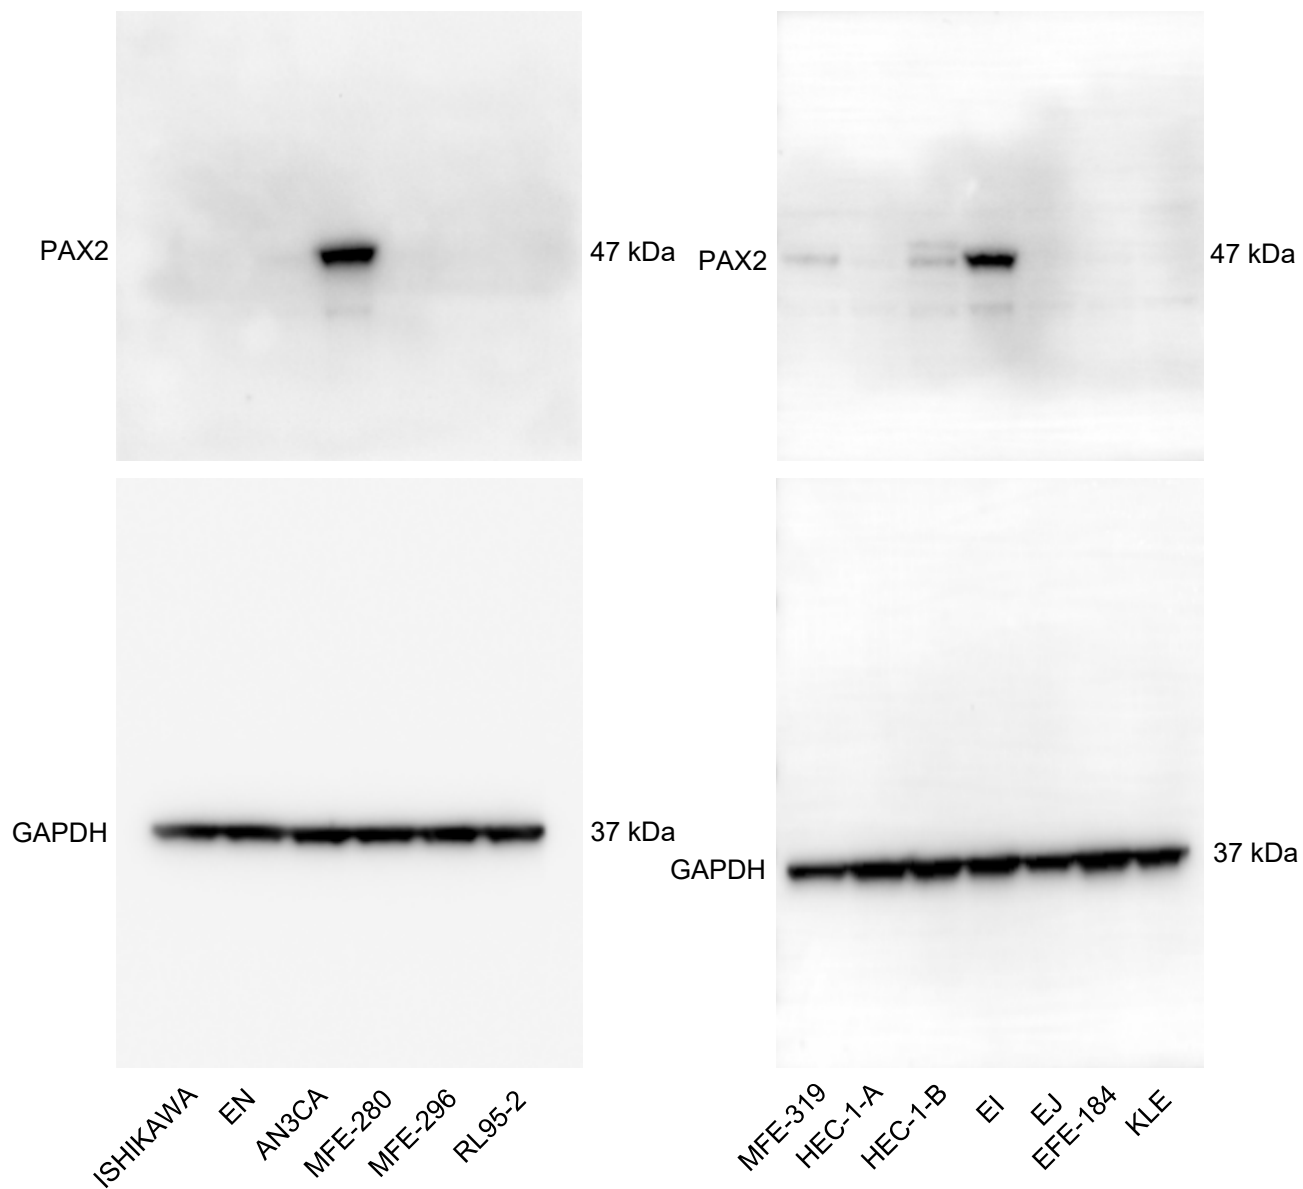

**Fig 3E.**

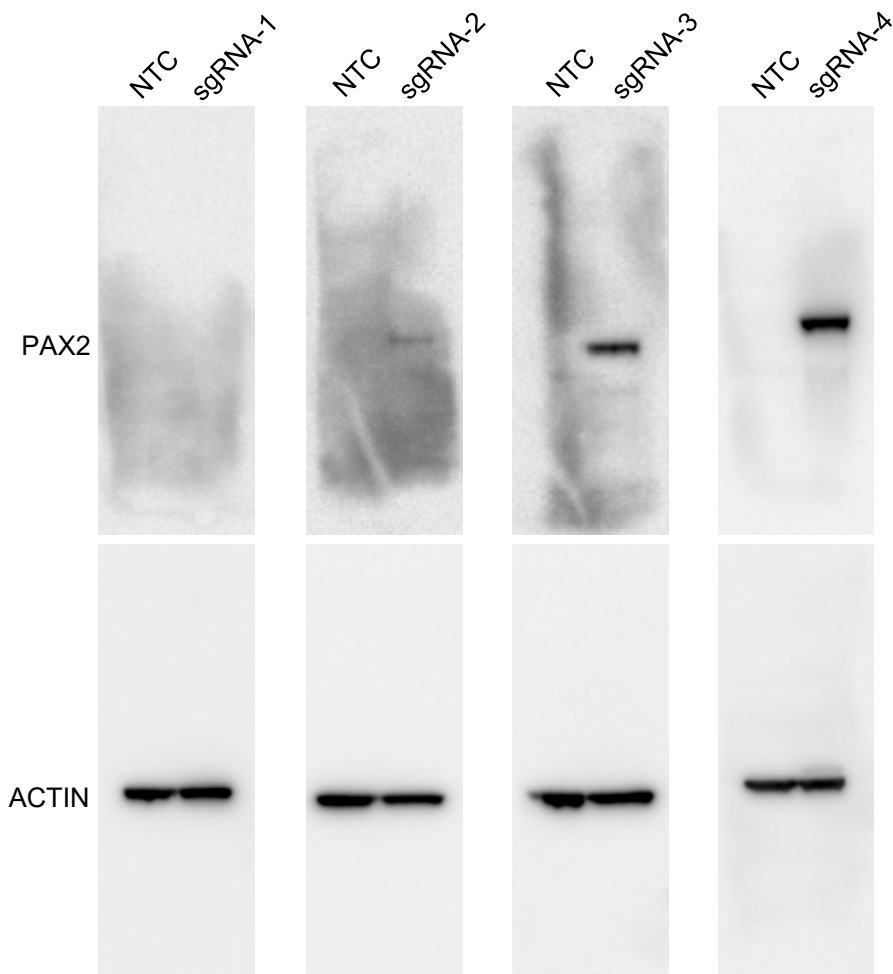

**Fig 3G.**

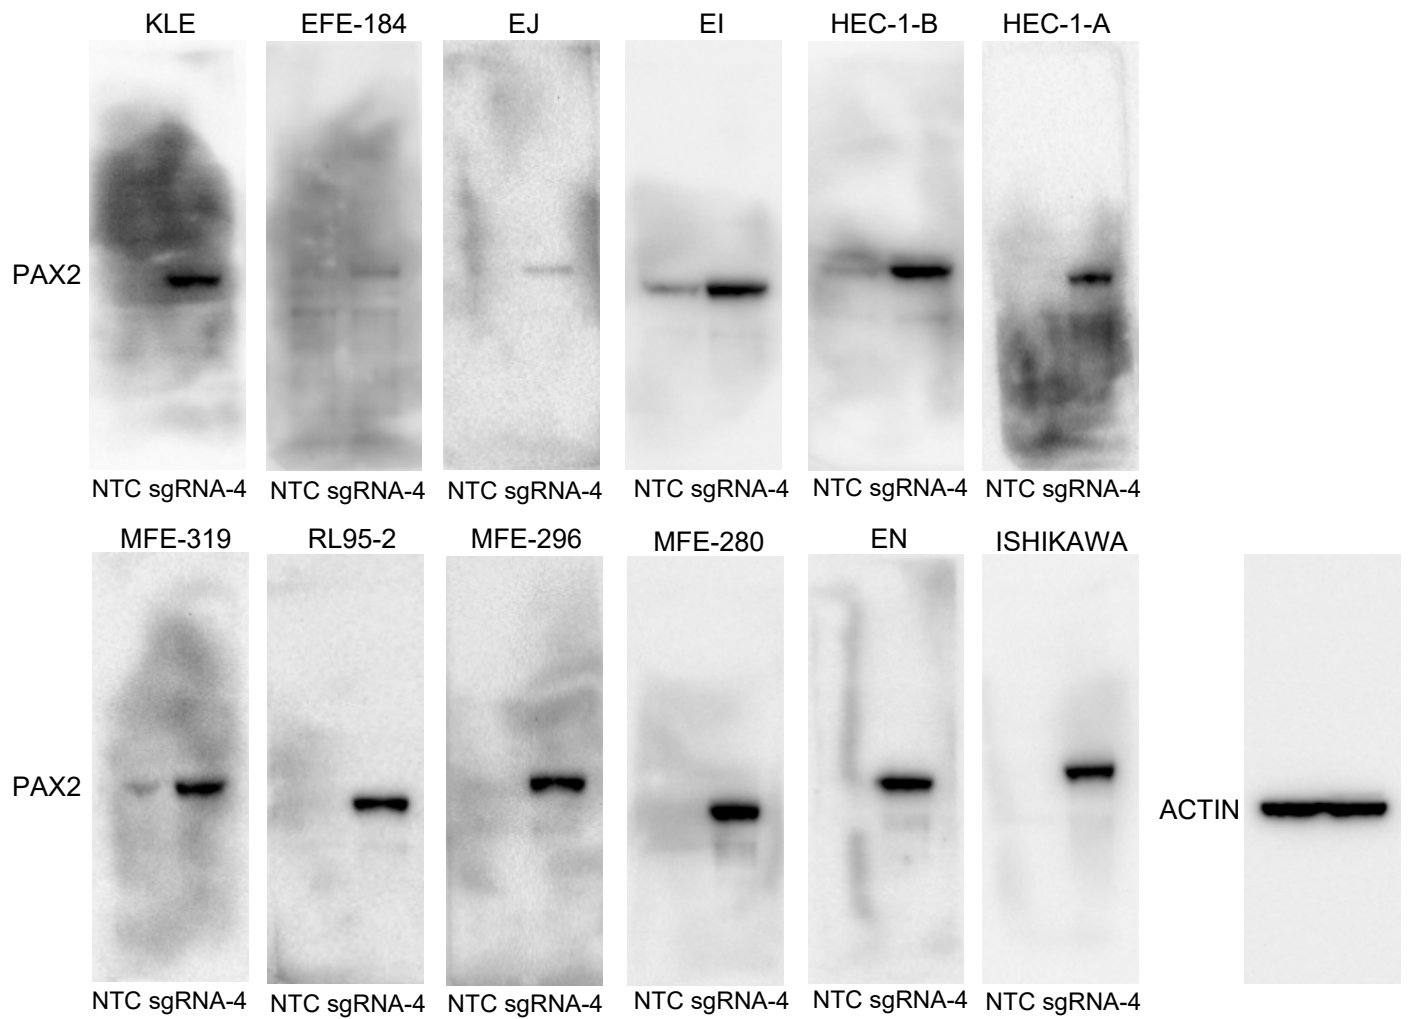

**Fig S1B.**

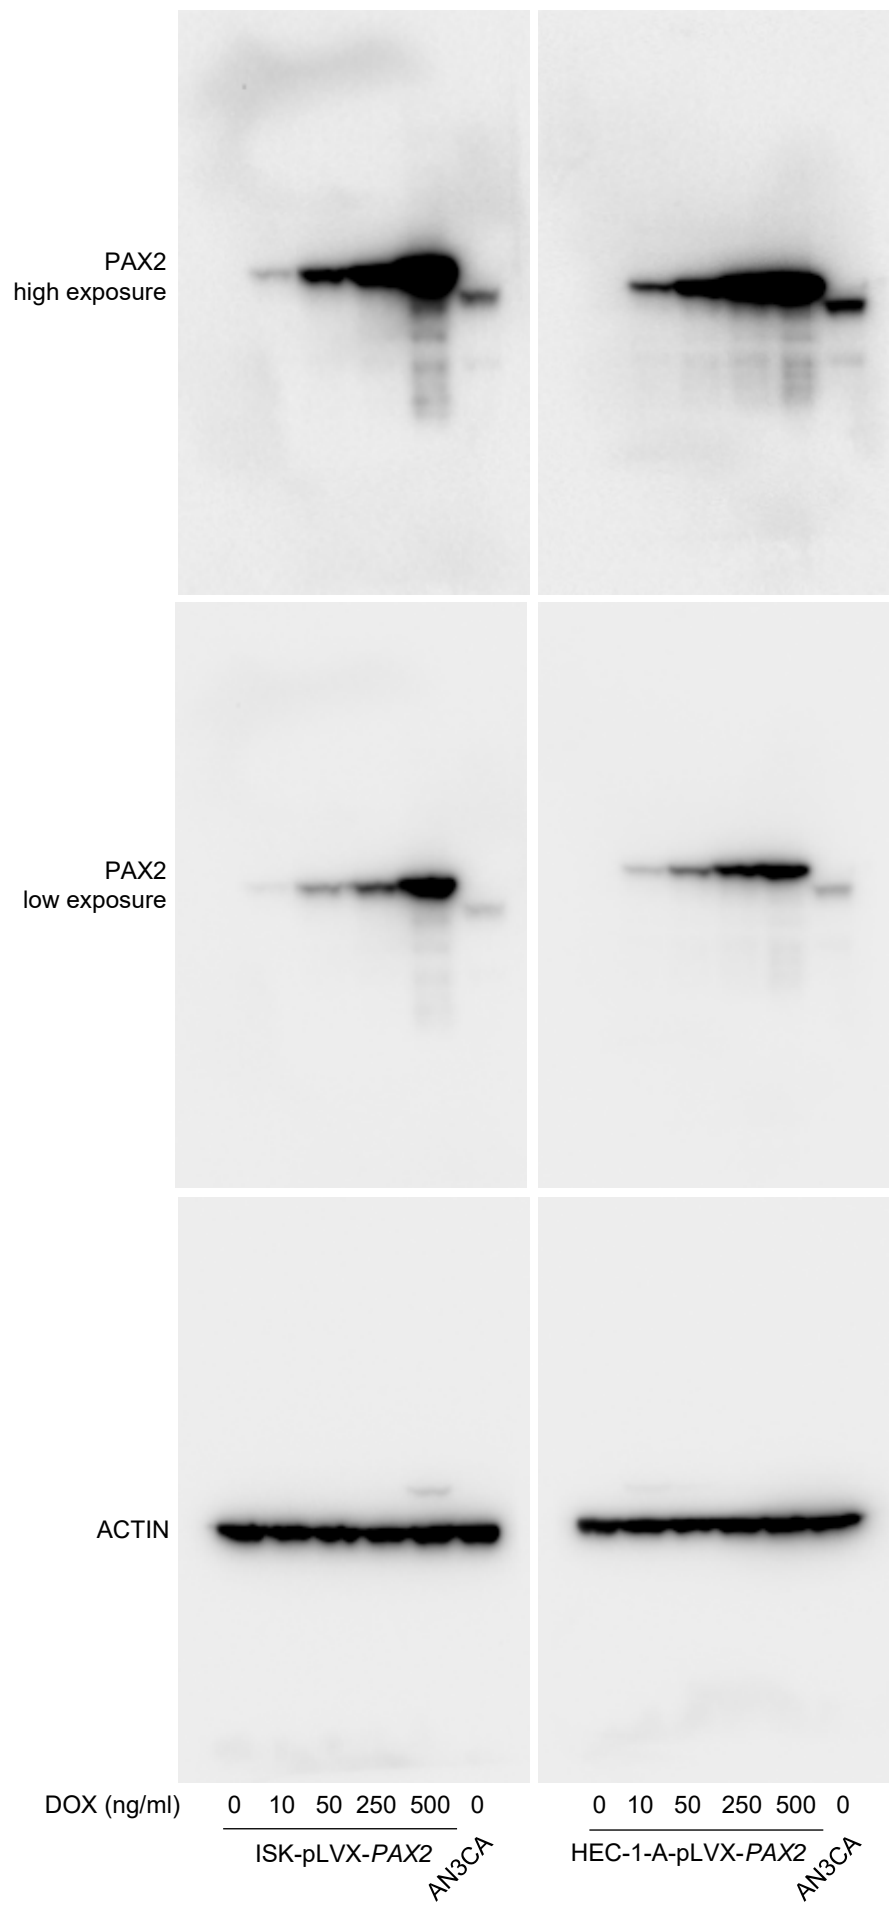

**Fig S1C.**

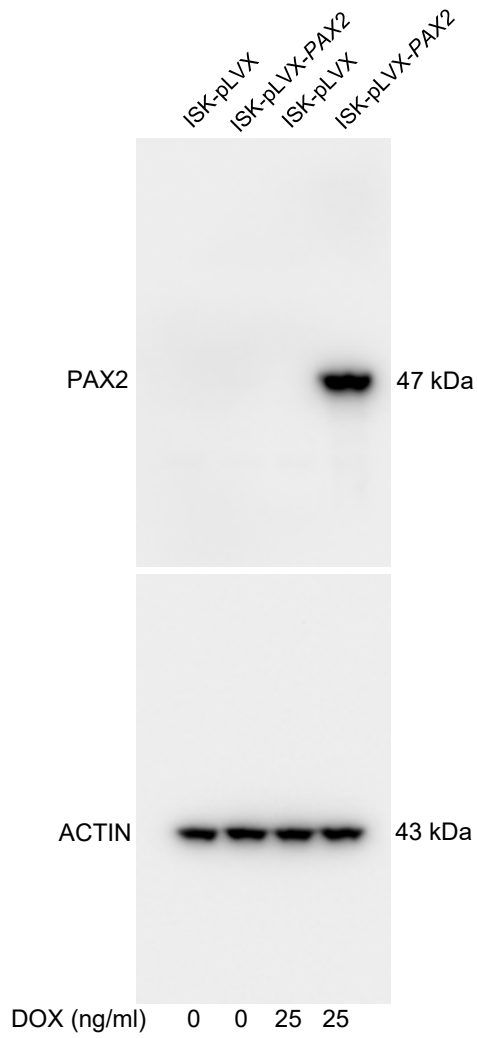

**Fig S1M.**

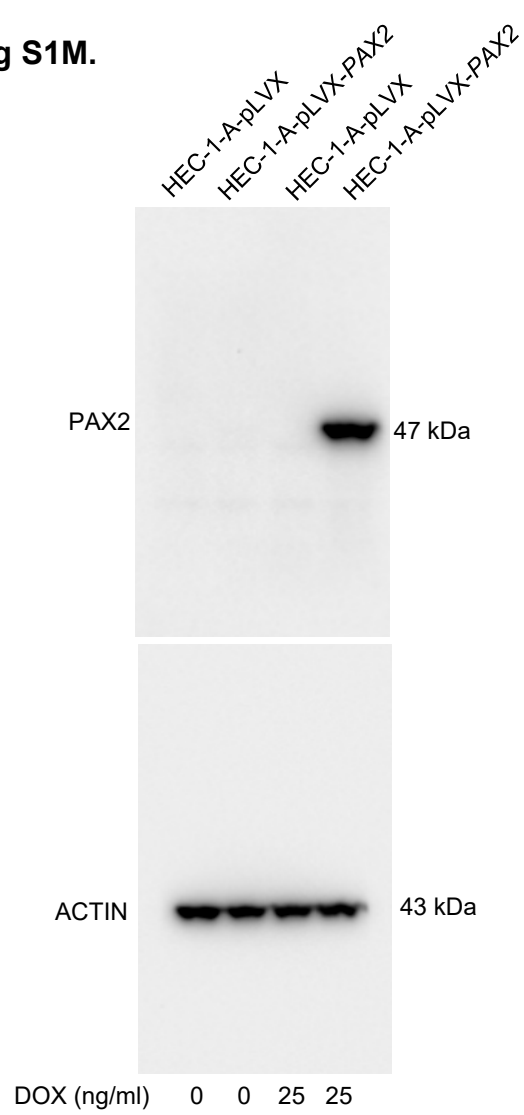

**Fig S1K.**

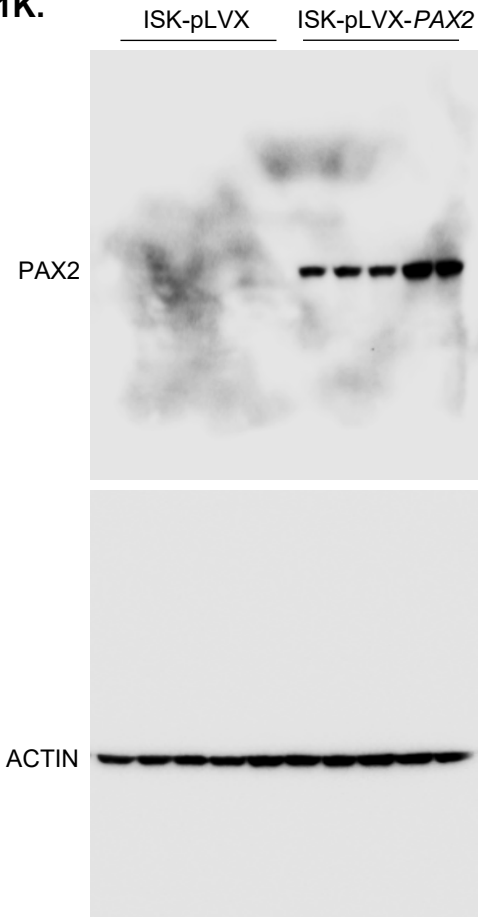

**Fig S1U.**

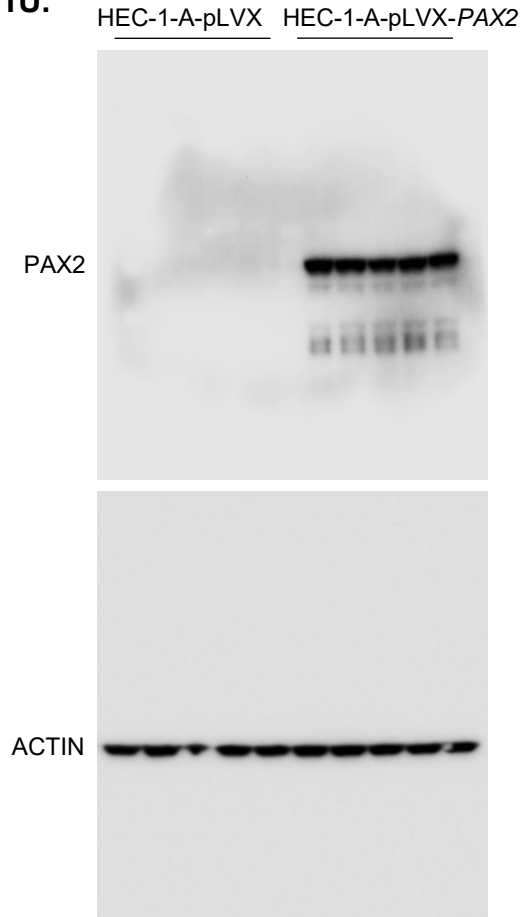

**Fig S2B.**

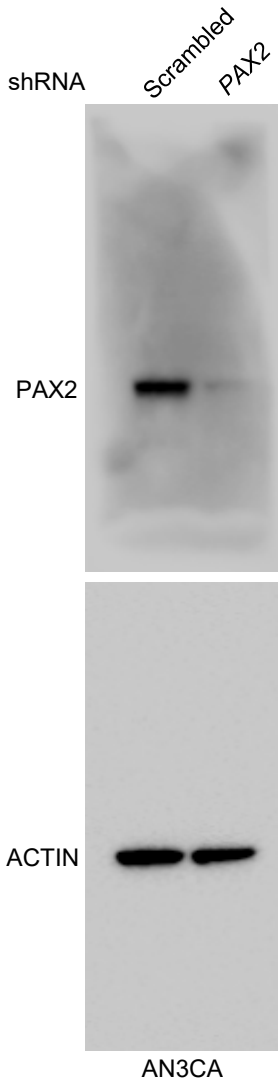

**Fig S2L.**

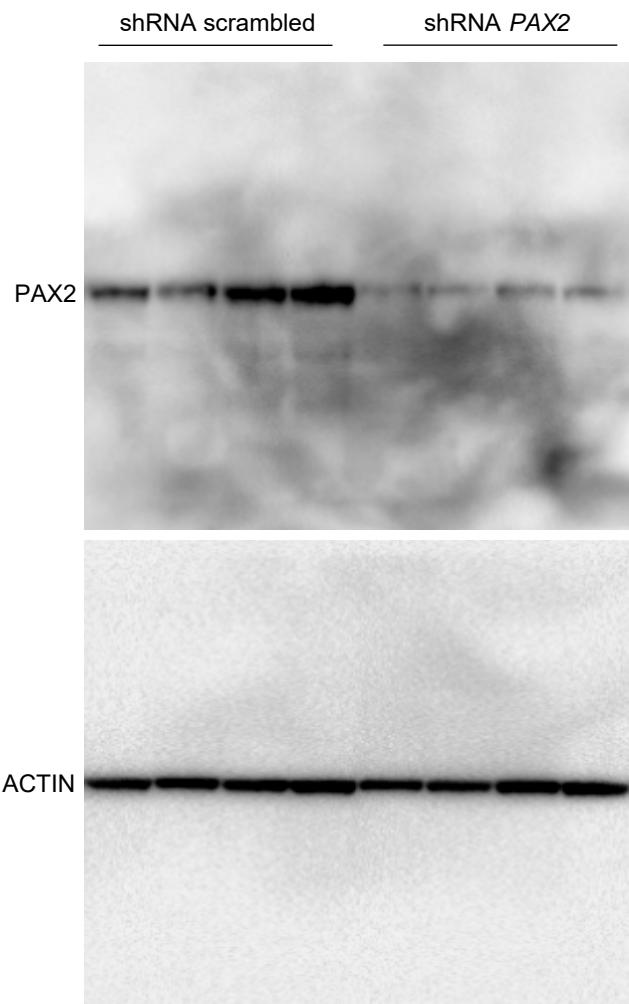

**Fig S3A.**

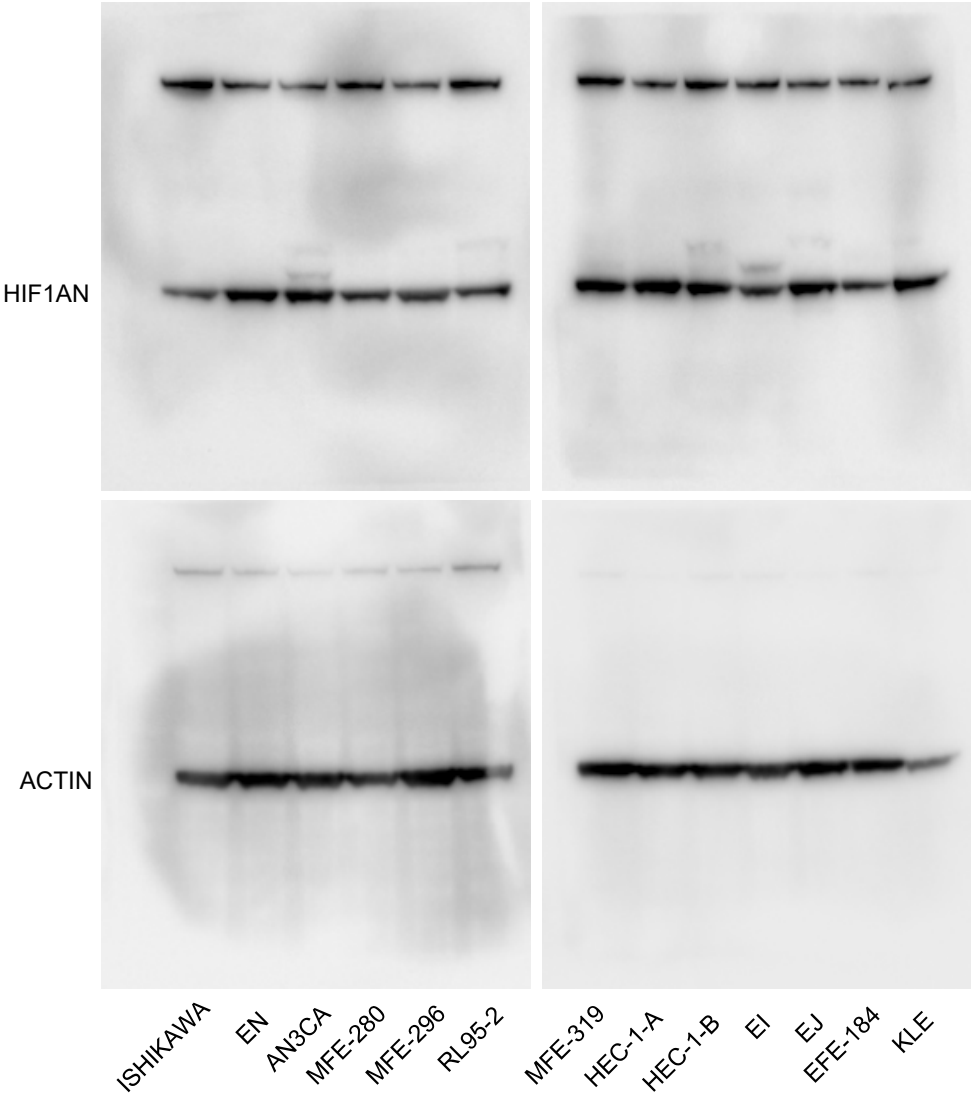

**Fig S3D.**

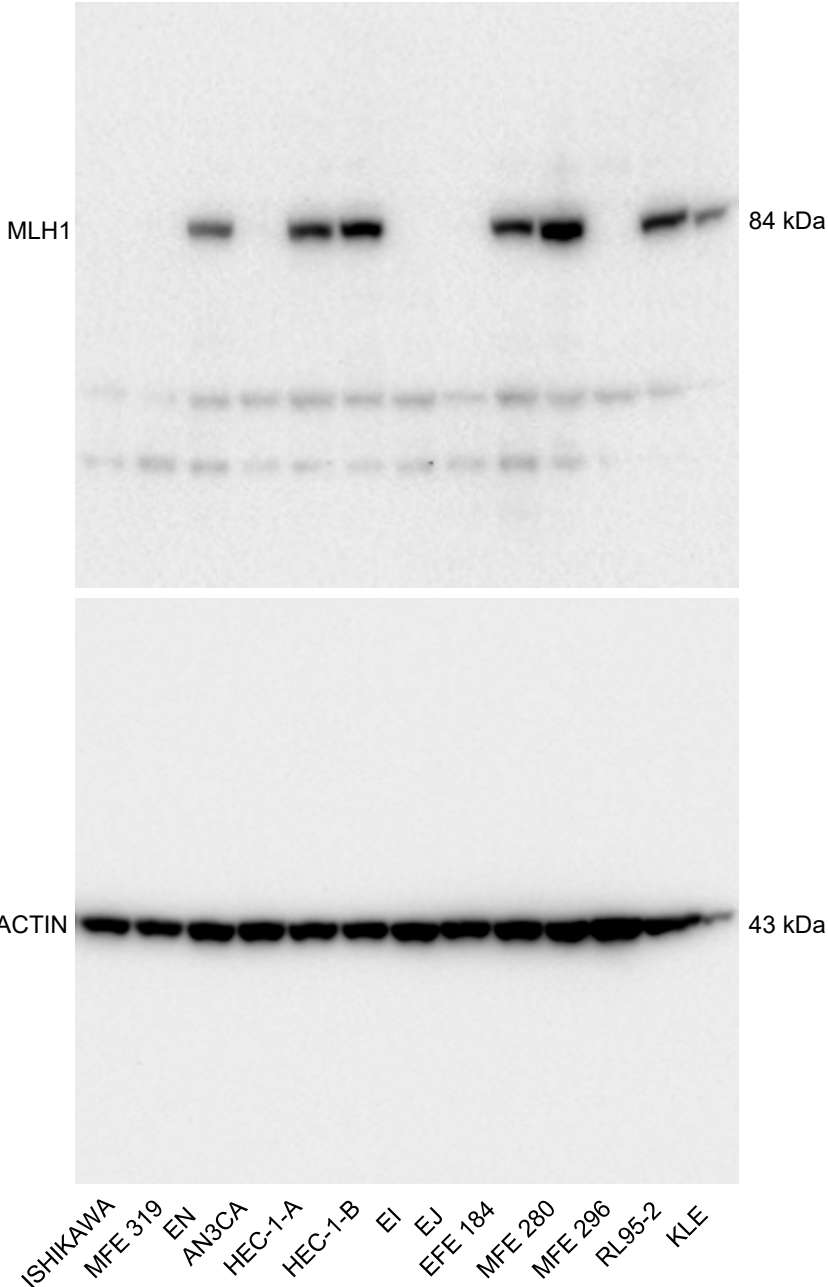

**Fig S5C.**

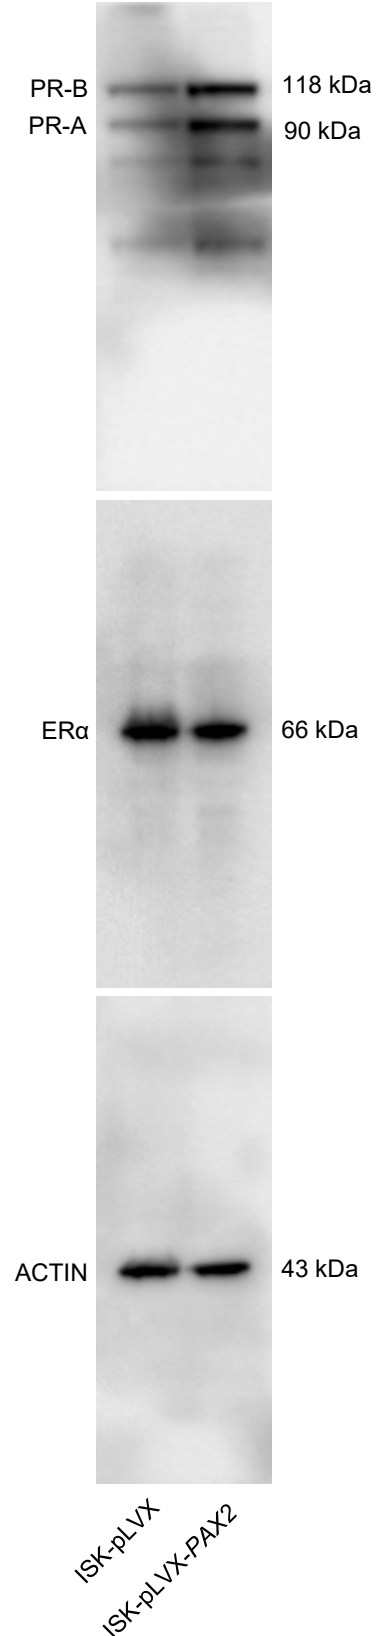

Supplement: sd2 [file 2]
